# Supplementary material for: The influence of high magnetic field on electric-dipole emission spectra of Eu3+ in different single crystals
Source: Royal Society of Chemistry journal article supplement (doi:10.1039/c3tc31385a), 2013-01-01
Supplement: c3tc31385a.pdf [file c3tc31385a.pdf]

## Influence of high magnetic field on electric-dipole emission spectra of $\text{Eu}^{3+}$ in different single crystals

Guihuan Du, Peng Liu, Weiwei Guo, Yibo Han, Junpei Zhang, Zongwei Ma, Junbo Han, Zuli Liu and Kailun Yao

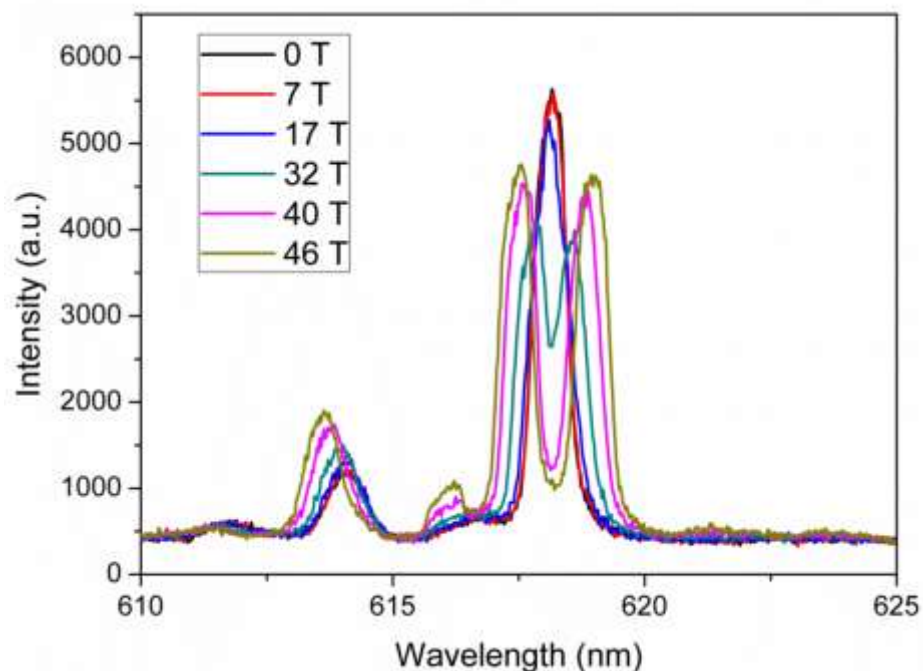

Fig 1 PL spectra of  $^5\text{D}_0\text{-}^7\text{F}_2$  band of  $\text{GdVO}_4:\text{Eu}^{3+}$  excited by 396nm laser under different magnetic field at 4.2K.

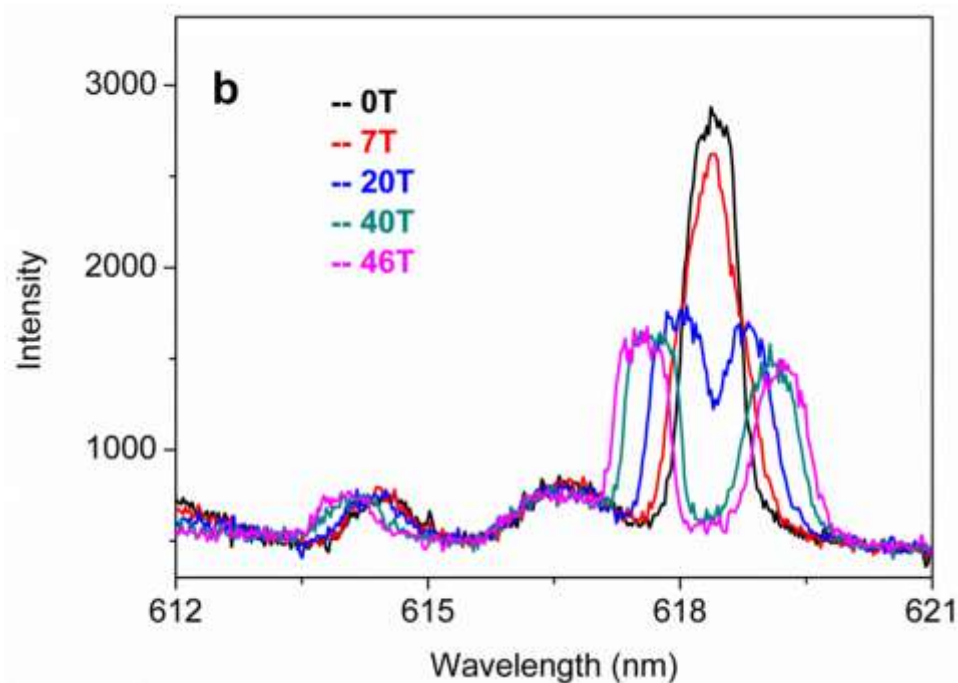

Fig 2 PL spectra of  $^5\text{D}_0\text{-}^7\text{F}_2$  band of  $\text{YVO}_4:\text{Eu}^{3+}$  excited by 396nm laser under different magnetic field at 4.2K.

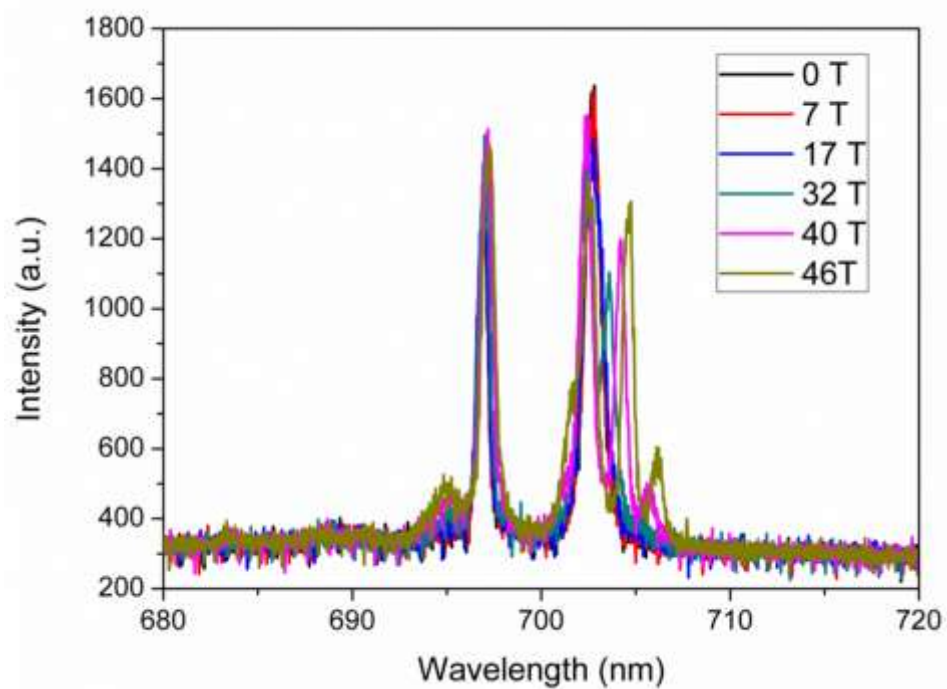

**Fig 3** PL spectra of  ${}^5D_0$ - ${}^7F_4$  band of GdVO<sub>4</sub>:Eu<sup>3+</sup> excited by 396nm laser under different magnetic field at 4.2K.

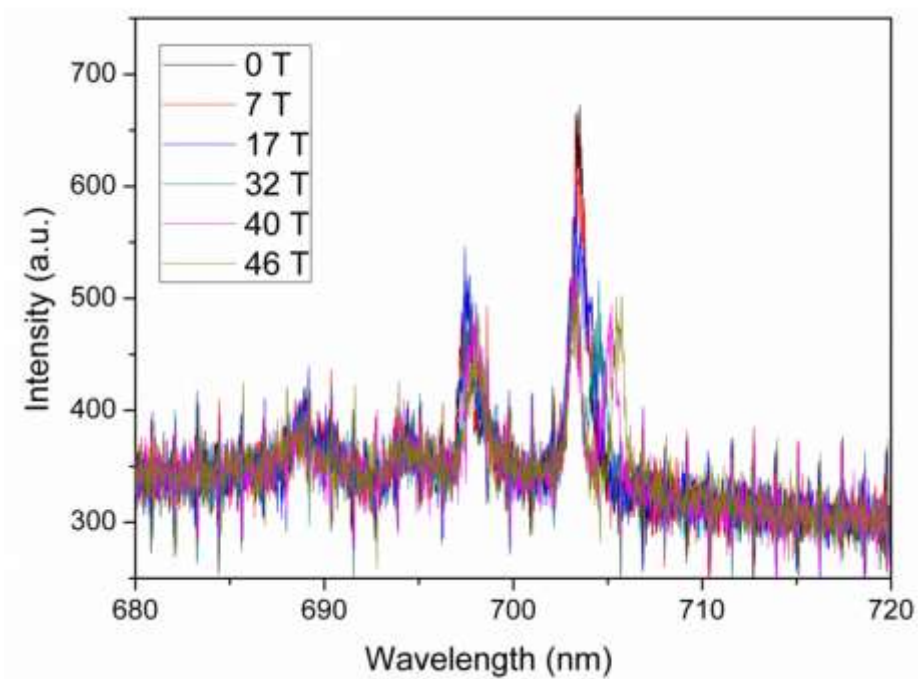

**Fig 4** PL spectra of  ${}^5D_0$ - ${}^7F_4$  band of YVO<sub>4</sub>:Eu<sup>3+</sup> excited by 396nm laser under different magnetic field at 4.2K.

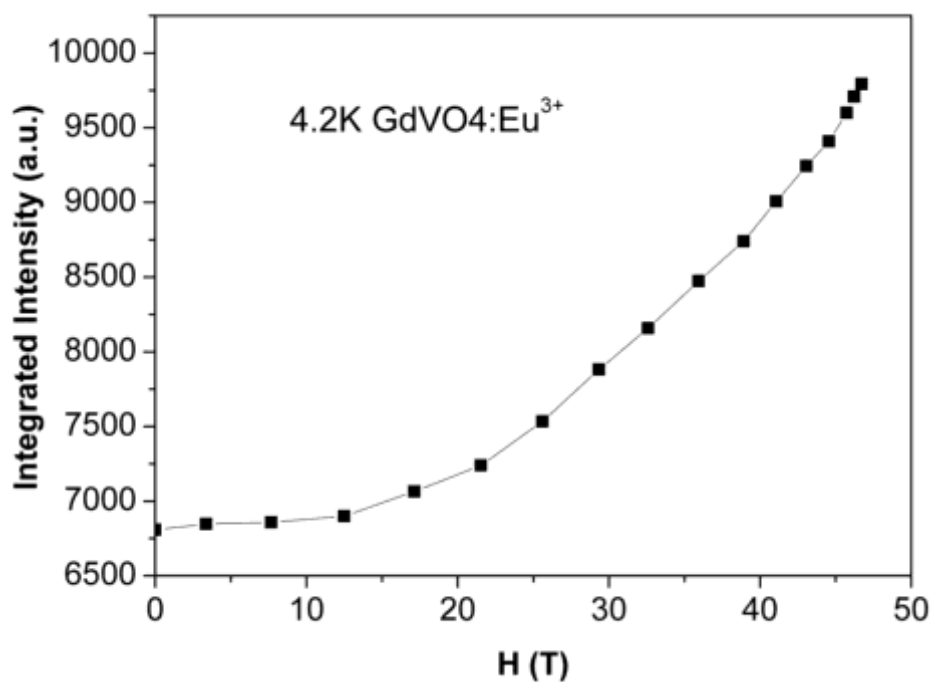

**Fig 5** Integrated intensity of  ${}^5D_0-{}^7F_2$  PL of GdVO<sub>4</sub>:Eu<sup>3+</sup> single crystal versus magnetic field at 4.2K

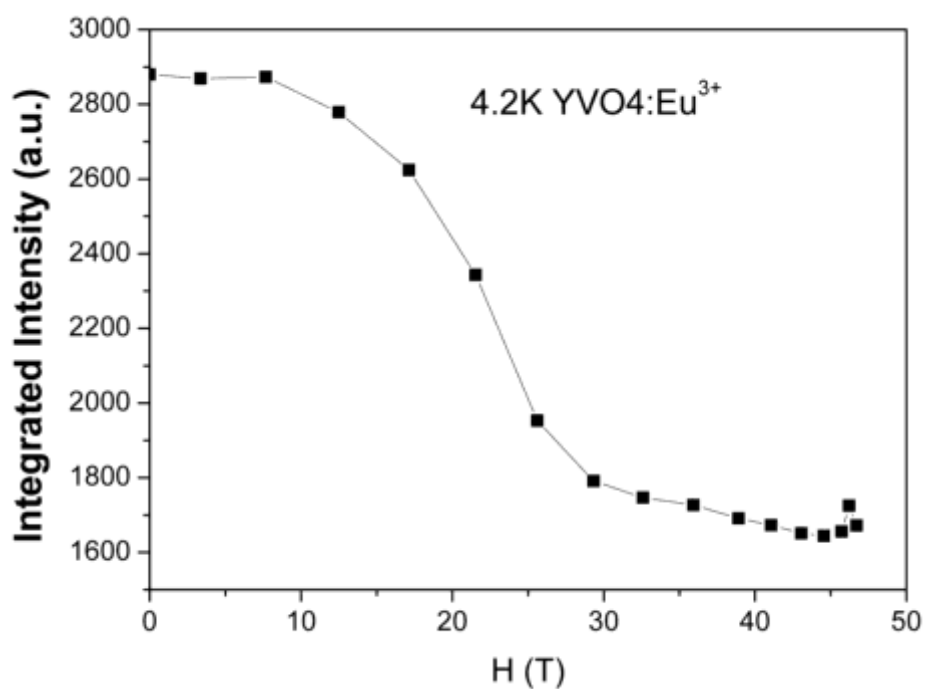

**Fig 6** Integrated intensity of  ${}^5D_0-{}^7F_2$  PL of YVO<sub>4</sub>:Eu<sup>3+</sup> single crystal versus magnetic field at 4.2K

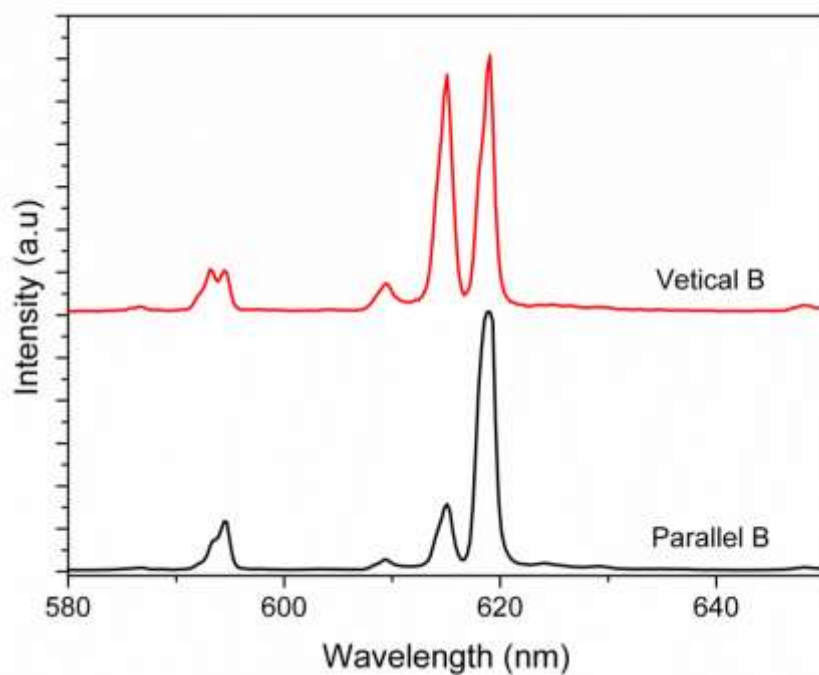

**Fig 7** PL of  ${}^5D_0$ - ${}^7F_2$  in YVO<sub>4</sub>:Eu<sup>3+</sup> single crystal in different direction for parallel and vertical magnetic field direction at 77K

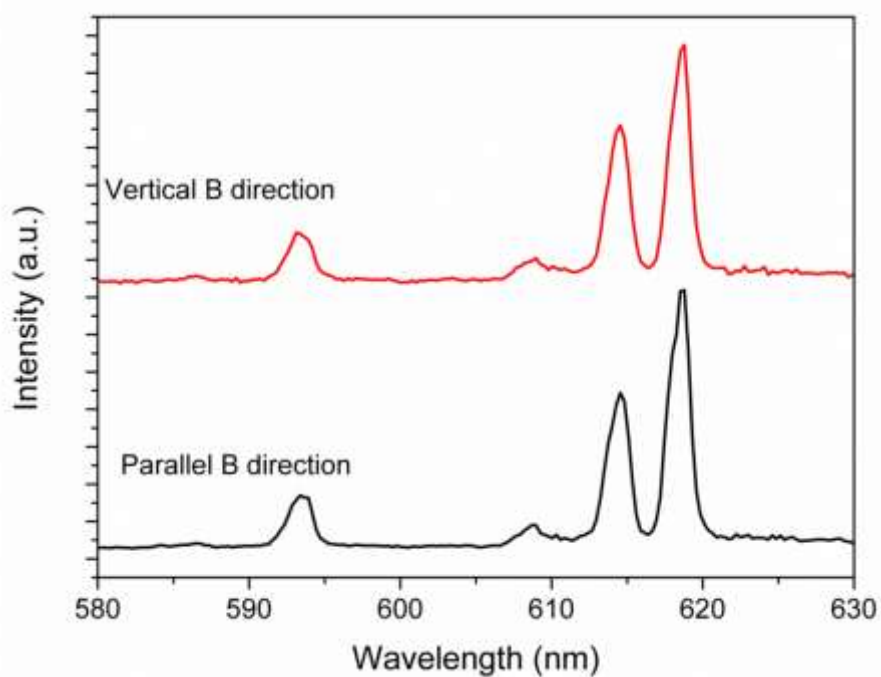

**Fig 8** PL of  ${}^5D_0$ - ${}^7F_2$  in GdVO<sub>4</sub>:Eu<sup>3+</sup> single crystal in different direction for parallel and vertical magnetic field direction at 77K
